# Supplementary material for: Novel α-L-Fucosidases from a Soil Metagenome for Production of Fucosylated Human Milk Oligosaccharides
Source: PubMed Central journal article supplement (PMC4723247; doi:10.1371/journal.pone.0147438), 2016-01-22
Supplement: pone.0147438.s001.pdf [file pone.0147438.s001.pdf]

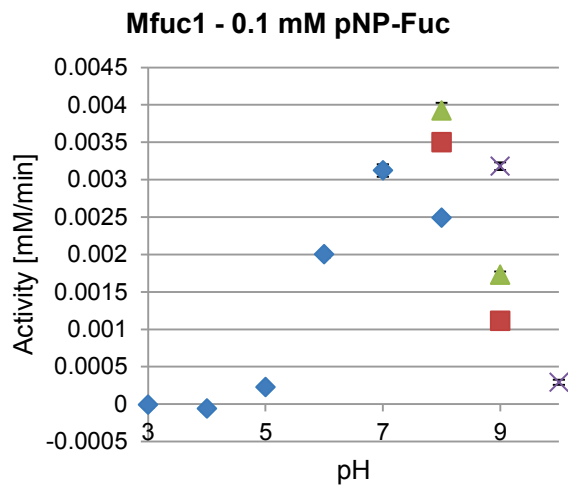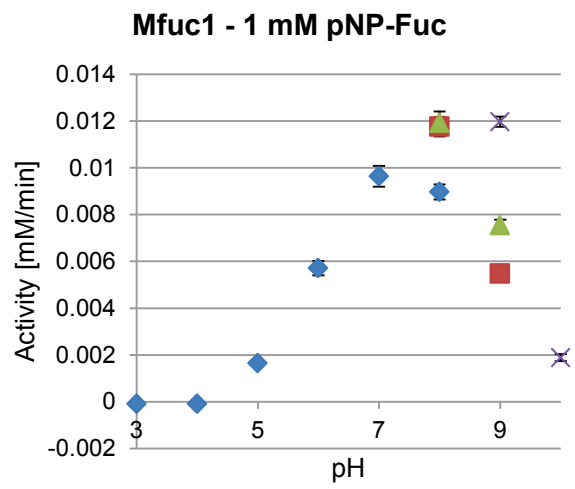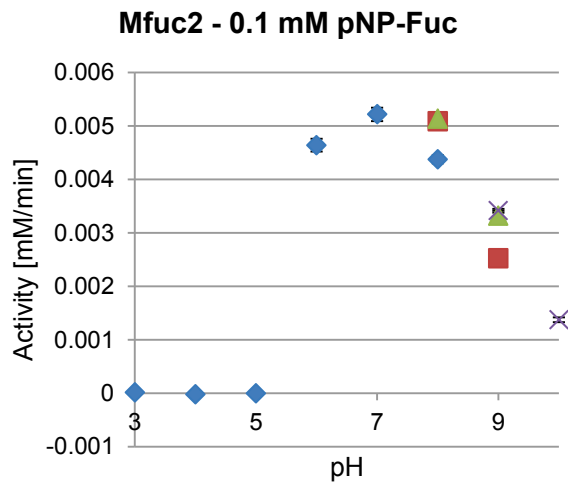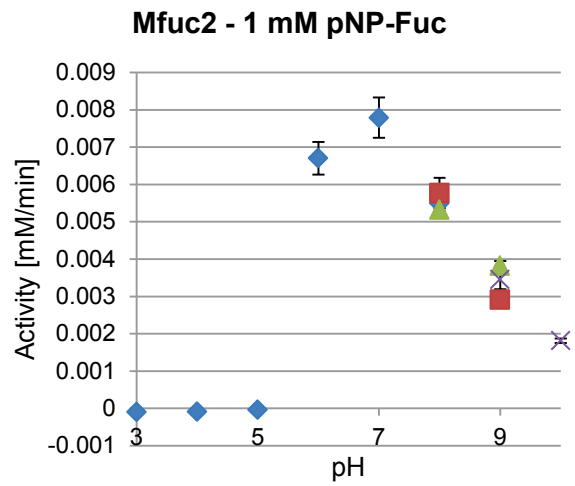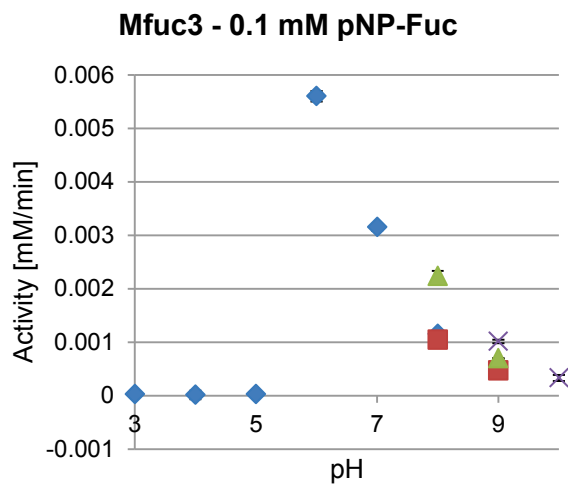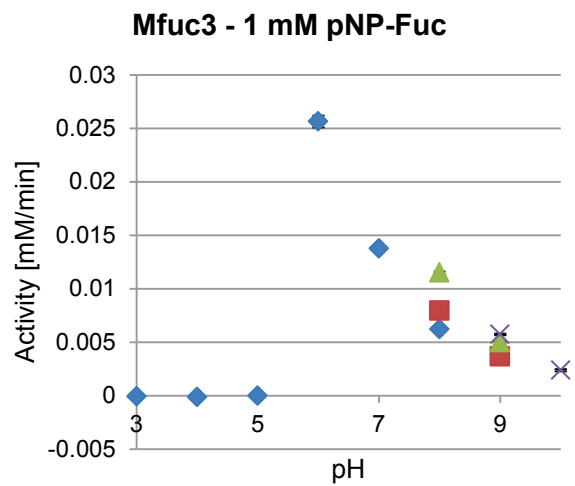

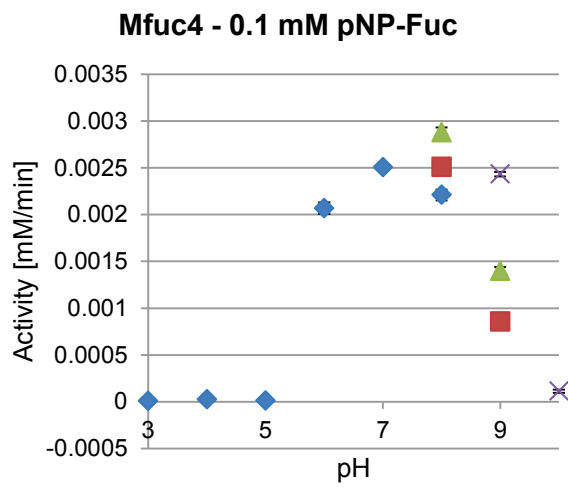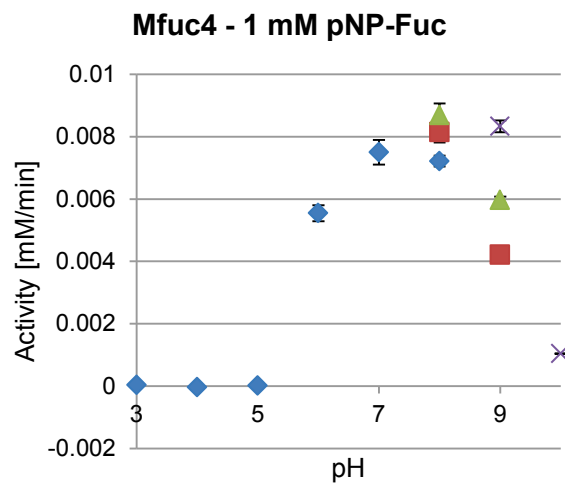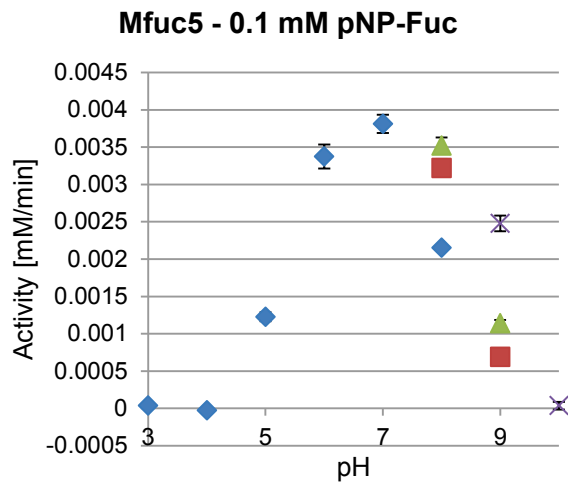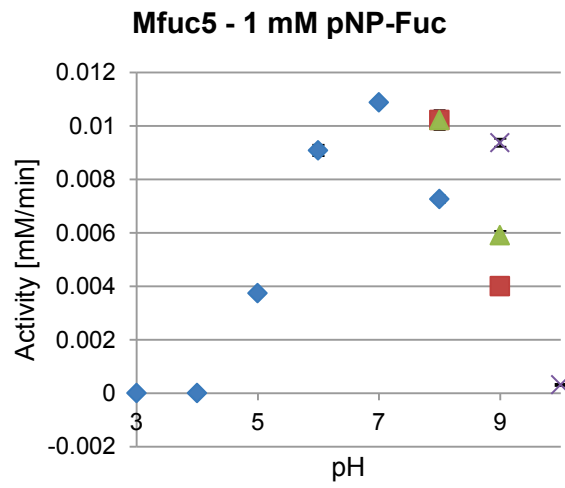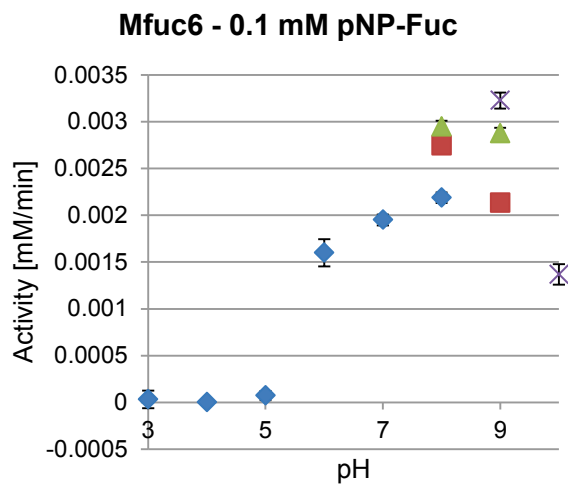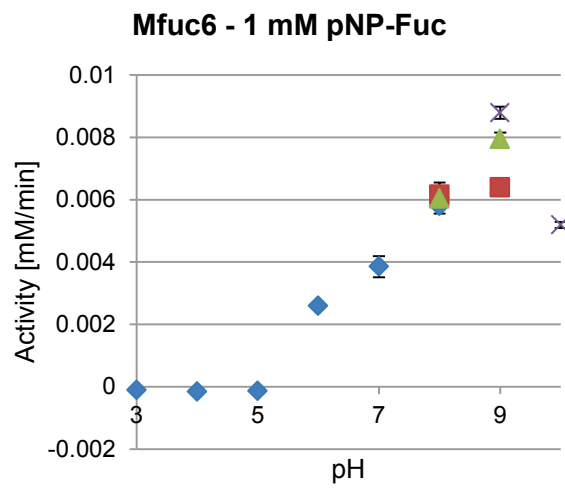

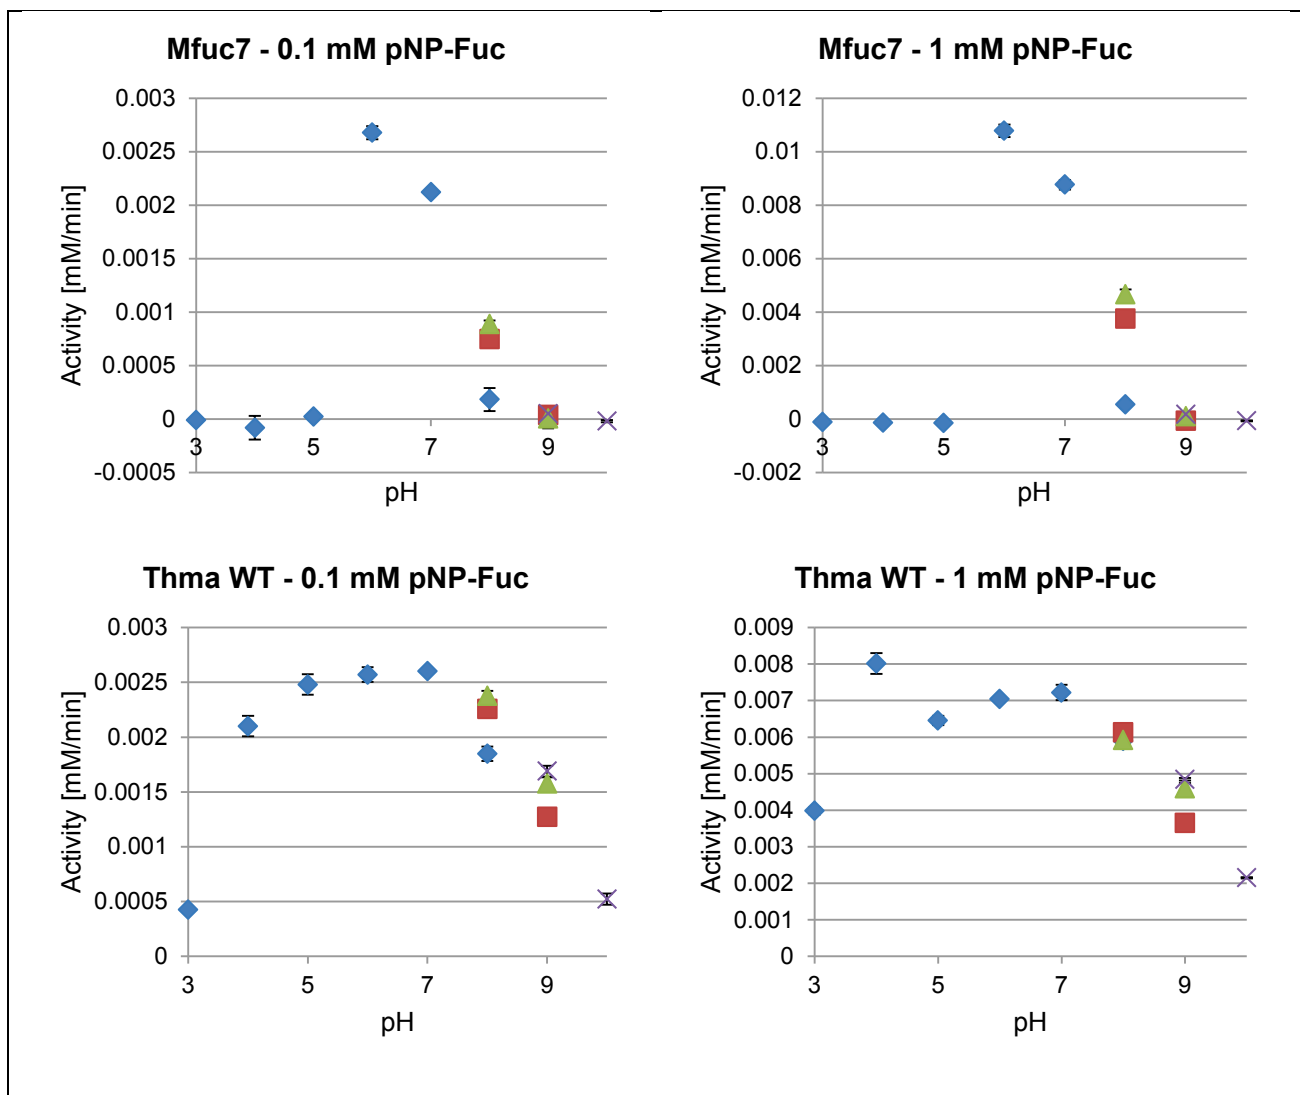

**S1 Fig. pH vs Hydrolase activity using pNP-Fuc as substrate.** The activity of the enzymes was tested at indicated pH and initial reaction rates were measured. The buffers used were 50 mM of phosphate-citrate (pH 3-8; blue diamonds), tricine (pH 8-9; red squares); glycylglycine (pH 8-9; green triangles), and glycine-NaOH (pH 9-10; purple crosses). Enzyme concentrations used in assays with 0.1 mM substrate were as follows: 0.2  $\mu\text{g}/\text{mL}$  Mfuc1, 0.2  $\mu\text{g}/\text{mL}$  Mfuc2, 0.6  $\mu\text{g}/\text{mL}$  Mfuc3, 0.3  $\mu\text{g}/\text{mL}$  Mfuc4, 0.2  $\mu\text{g}/\text{mL}$  Mfuc5, 1.0  $\mu\text{g}/\text{mL}$  Mfuc6, 0.2  $\mu\text{g}/\text{mL}$  Mfuc7, and 0.3  $\mu\text{g}/\text{mL}$  Thma  $\alpha$ -L-fucosidase. With exception of Mfuc2, the double concentration of enzyme was used in assays with 1 mM substrate. All reactions were done at 30  $^{\circ}\text{C}$ .
