# Supplementary material for: Novel α-L-Fucosidases from a Soil Metagenome for Production of Fucosylated Human Milk Oligosaccharides
Source: PubMed Central journal article supplement (PMC4723247; doi:10.1371/journal.pone.0147438), 2016-01-22
Supplement: pone.0147438.s002.pdf [file pone.0147438.s002.pdf]

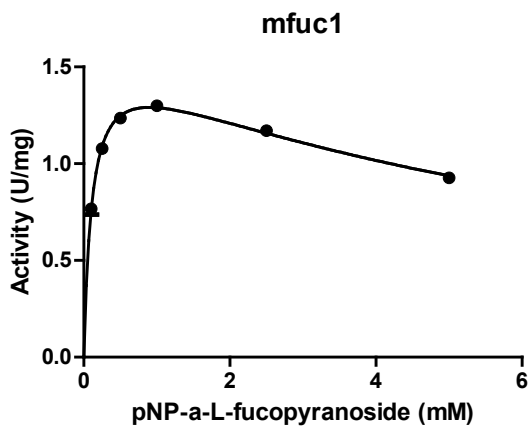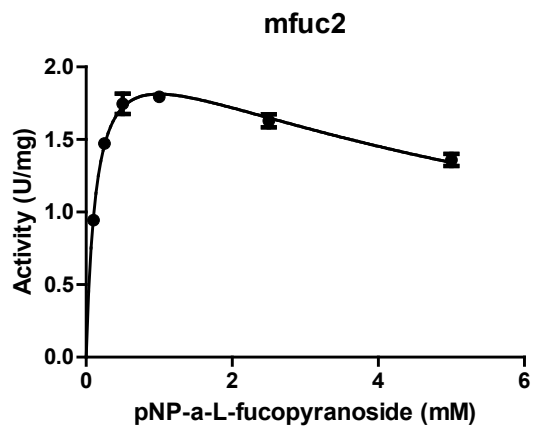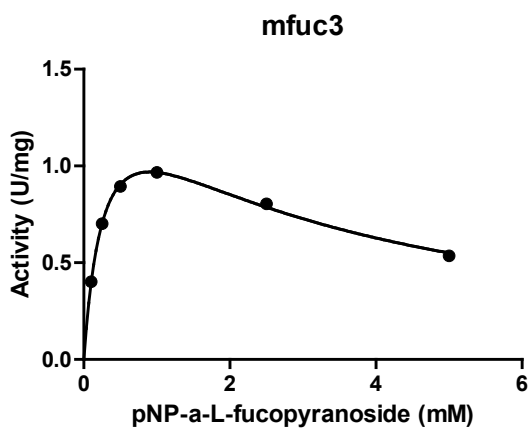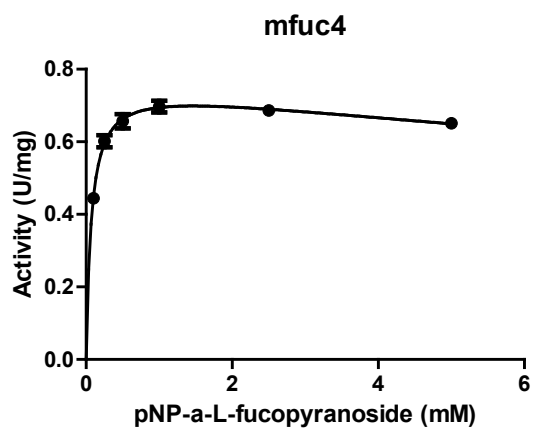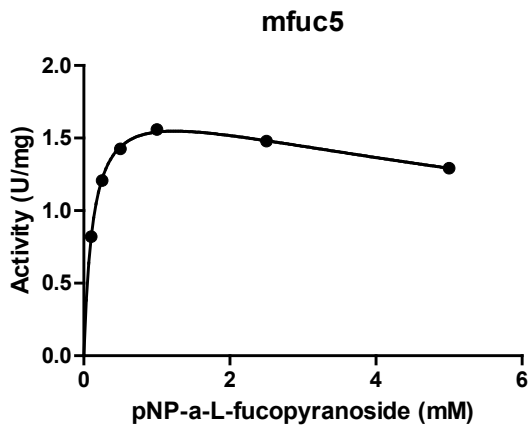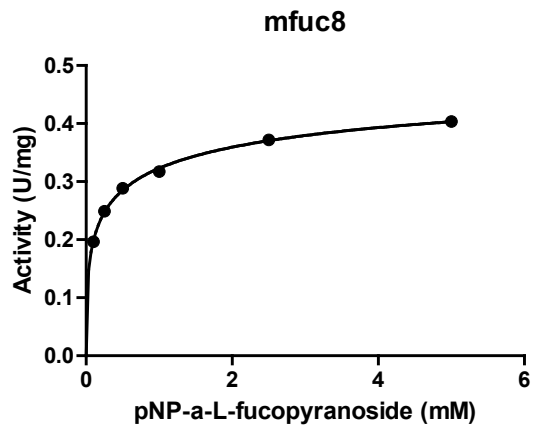

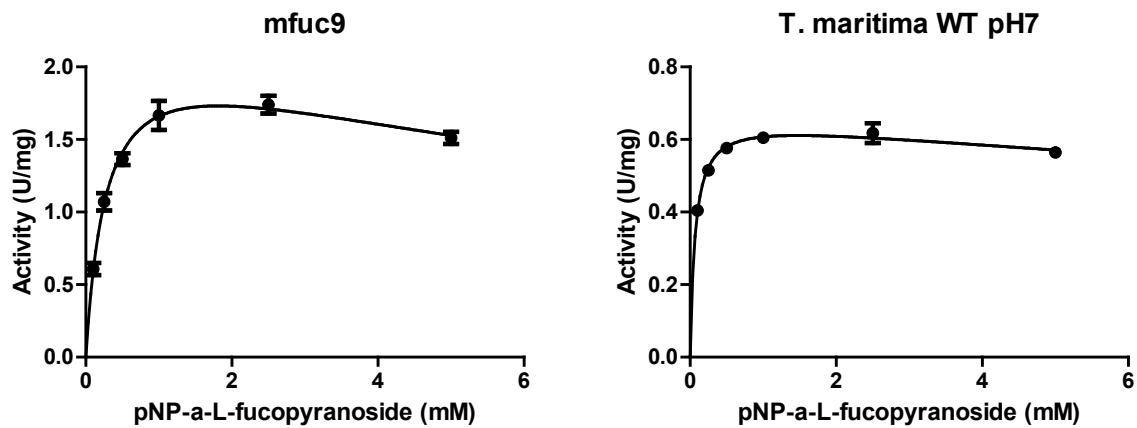

**S2 Fig. Substrate concentration vs. hydrolase activity plots using pNP-Fuc as substrate.** Substrate saturation curves for metagenomic  $\alpha$ -L-fucosidases along with non-linear regression fits with sigmoidal allosteric (Mfuc8;  $Y=V_{max} * X^h / (K_{prime} + X^h)$ ) and substrate inhibition (all except Mfuc6,  $Y=V_{max} * X / (K_m + X * (1 + X/K_i))$ ) model. The various enzymes were assayed at 30 °C at their identified optimum pH. In case of of Thma WT, the optimum pH was 7 at 0.1 mM pNP-Fuc while two optima (pH 4 and 7) were observed at 1 mM pNP-Fuc, consequently substrate saturation was tested at both pH. Enzyme concentrations used were as follows: 0.2  $\mu$ g/mL Mfuc1, 0.03  $\mu$ g/mL Mfuc2, 0.6  $\mu$ g/mL Mfuc3, 0.3  $\mu$ g/mL Mfuc4, 0.2  $\mu$ g/mL Mfuc5, 1.0  $\mu$ g/mL Mfuc6, 0.2  $\mu$ g/mL Mfuc7, 0.3  $\mu$ g/mL Thma  $\alpha$ -L-fucosidase. The concentrations pf pNP-Fuc tested were 0.1, 0.25, 0.5, 1.0, 2.5, and 5.0 mM
