# Supplementary material for: Novel α-L-Fucosidases from a Soil Metagenome for Production of Fucosylated Human Milk Oligosaccharides
Source: PubMed Central journal article supplement (PMC4723247; doi:10.1371/journal.pone.0147438), 2016-01-22
Supplement: pone.0147438.s003.pdf [file pone.0147438.s003.pdf]

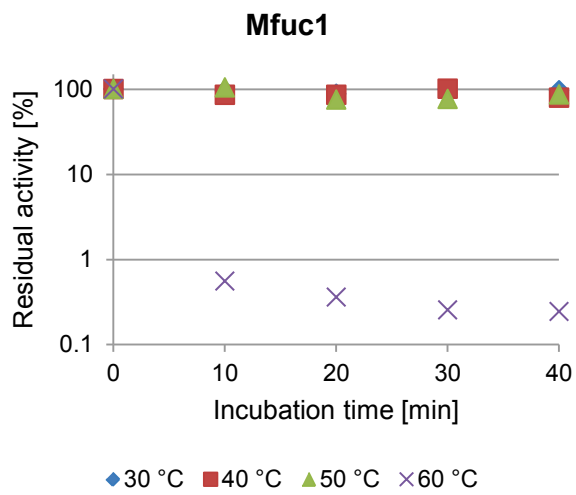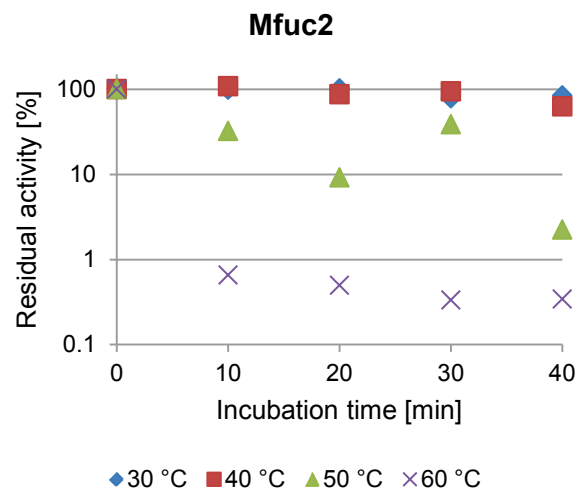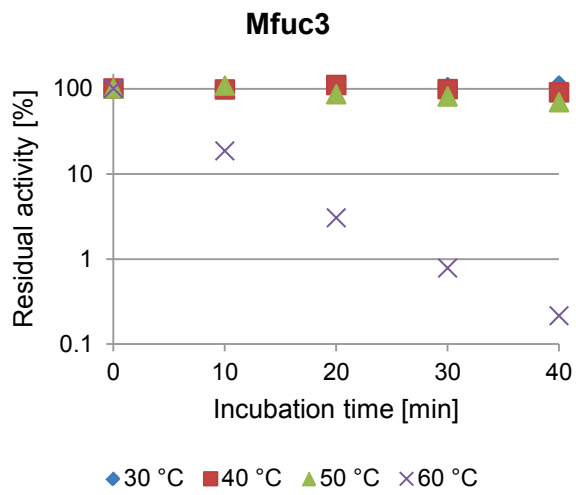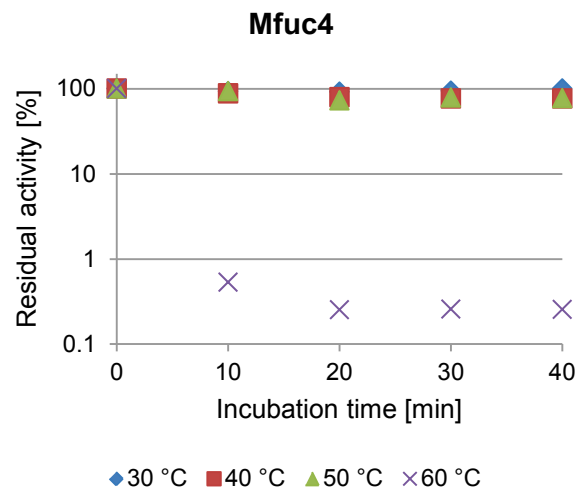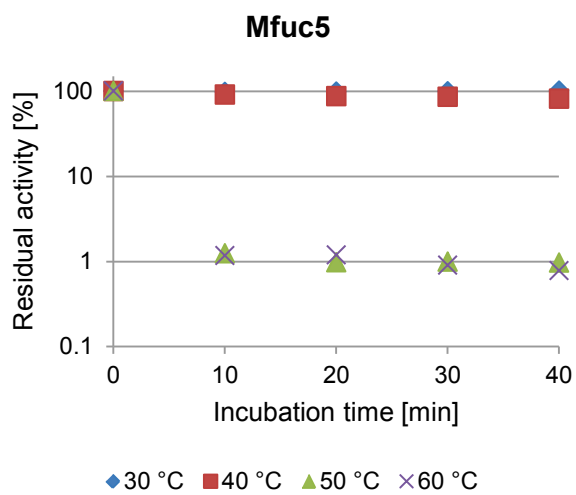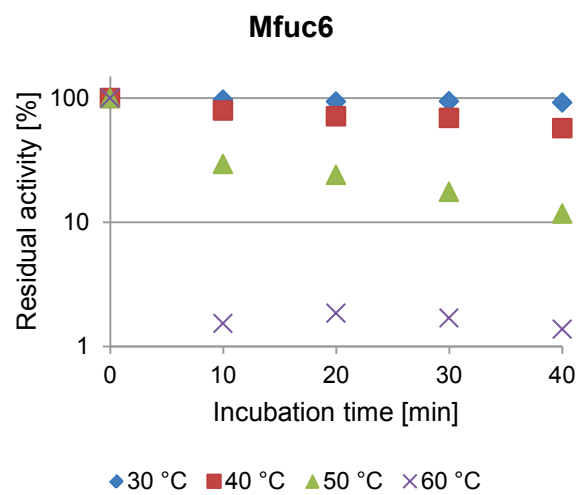

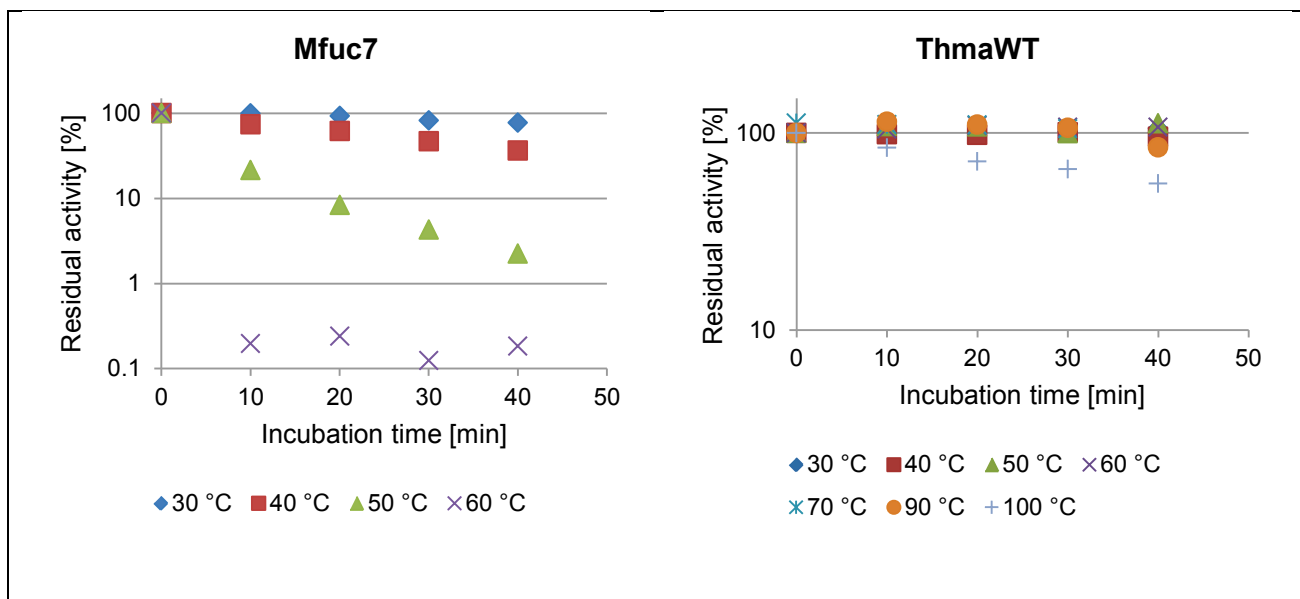

**S3 Fig. Heat inactivation of  $\alpha$ -L-fucosidases.** The enzymes were diluted in a 5 mM pH buffer reflecting pH optimum and incubated at indicated temperatures and periods of time after which residual activity was measured in a continuous assay at pH 7 at 30 °C. Enzyme concentrations used in assays with 0.1 mM substrate were as follows: 0.8  $\mu$ g/mL Mfuc1, 0.4  $\mu$ g/mL Mfuc2, 1.2  $\mu$ g/mL Mfuc3, 0.9  $\mu$ g/mL Mfuc4, 0.7  $\mu$ g/mL Mfuc5, 3.9  $\mu$ g/mL Mfuc6, 0.5  $\mu$ g/mL Mfuc7, 0.9  $\mu$ g/mL Thma  $\alpha$ -L-fucosidase. Activities were normalized on basis of enzyme activity with no heat treatment.
