# Supplementary material for: Novel α-L-Fucosidases from a Soil Metagenome for Production of Fucosylated Human Milk Oligosaccharides
Source: PubMed Central journal article supplement (PMC4723247; doi:10.1371/journal.pone.0147438), 2016-01-22
Supplement: pone.0147438.s004.pdf [file pone.0147438.s004.pdf]

```

          310      320      330      340      350      360
          |        |        |        |        |        |
Mfuc1    HATYKG----LPGKGRNDWQSESLVAMIRAI SPKI-----ILNNRLDLP-----IA
Mfuc4    GRDYNG----LPGKGRNEWESEKLYALVRRRLRPHI-----IIDNRLDLPA-----HL
Mfuc7    SWTGEGDKAWMKGKGGKDDWESEELIRIARELQPGI-----IIDNRTEIE-----Q
Mfuc2    ELNWGWS----KGRGKADWHSEELMAMVRELQPGI-----LLNDRLEVG-----
Mfuc5    EMRGEA-----WKATELVKMVRELQPGI-----IIDNRLGGDIKAAEPEIYA
Mfuc6    GWERTP-----DEWKATELEAMIRSLQPEI-----LINDRLPGA-----
Thma_opt EK GKED-----LKYLFAYYYNKHPEG-----SVNDRWG-----
Mfuc3    ALAQGAGCSIGDQLHPRGQLDPAVYQRIGEYVAEVERREAWVQNT RPLPEVGVLT VNGAP

```

: . : \*

```

          370      380      390      400      410      420
          |        |        |        |        |        |
Mfuc1    AD-----IYTPEQVQPTTEWVQVD---GEPVVWEACQTFSGSWG YHRDE--ETWKSPEQLI
Mfuc4    AD-----VHTPEQWQPTTEWVKVD---GEPVVWEACQTFSGSWG YHRDE--TTWKDAGQLI
Mfuc7    D-----LWTPEQYQPTTEWVRHPQ--TGELVVWEACQTL SSGSWG YHRDE--QTWKSP EMLL
Mfuc2    GD-----IVTPEQYQPHGWMKVN---GQRVTWEACQTFNGSWG YHRDN--LDWKPA GMLV
Mfuc5    GD-----FASPEQI I PPEGVVNEL--GAPVPWEACITLNDHWG YA AWD--KNWKS PKTVV
Mfuc6    GD-----YDTPEQFVPPQLPARA---W----EACMTINESW GYNPDD--KQFKS GRQLV
Thma_opt -----VPHWDFKTA EYHVNYPGDLPGYKWEFTRGIGLSFGYNRNEGPEHMLSVEQLV
Mfuc3    GVS G DMLHSAGDSLPLSDLGALFALEQQKVFQFLDASNDLSPYQVVILPDQVAVDDRLA

```

: . \*

```

          430      440      450      460      470      480
          |        |        |        |        |        |
Mfuc1    MMLVNTVALGGNLLMN-----VGPTSLGTL DGR
Mfuc4    RMLVNTVARGGNLLMN-----VGPTSRGTFDQR
Mfuc7    RMLVNTVSLGGNLLMN-----VGPTSRGYLDAR
Mfuc2    QMLIDS SVSKGGNLLN-----VGPNGRGEFEPR
Mfuc5    RALVEC SVSKGGNLLL-----VGP TAKGEI PAE
Mfuc6    HTLCEIAARGGNLLL-----VGP MADGKL PSE
Thma_opt YTLVDV SVSKGGNLLL-----VGP KGDGTI PDL
Mfuc3    ERLRAYLRAGGKLLVSDRSGLQDGF TLAEMGVHYAGPAPYAPDYLLLEPEI SAGIELM

```

: . \* : \*

```

          490      500      510      520      530      540
          |        |        |        |        |        |
Mfuc1    ALKALGVYRDWMALHSESIYGCTQSE-----FPTPQDCRLTQ-----
Mfuc4    ALDALAVYRDWMAVHSESIYGCTQSA-----YQEPLDCRLTQ-----
Mfuc7    AETALKAYAGWMRYNSRSIYGCTMAEPEFL--SAAPPDCRLTQSM-----
Mfuc2    AVERLRQIGAWMHLHRRAITGCTASQ-----FTPPP DGRYTQ-----
Mfuc5    CLTILDQVGGWMHANGTSVYACGSTD-----LPKPEWGRFTR-----
Mfuc6    LLERLAVIEGWMARNAESIIGTAPGL-----EPWQFYGPSTR-----
Thma_opt QKERLLGLGEWLRKYGD AIYGT SVWERCCAKTEDGTEIRFTR-----
Mfuc3    AHSCEQQGSRVILASGARVLARS GAPYFNRTWDHFC SHQYTPMAEDSGDPVAVEHGNVIY

```

: : \*

```

          550      560      570      580      590      600
          |        |        |        |        |        |
Mfuc1    -----NGK KLYVHVYAWPFK--FLQLQGLGG-----KAEFARFLHDGSE
Mfuc4    -----NGNKLYVHI FAWPFR--HLYLEGLAD-----KVAYARFLHDGSE
Mfuc7    -----DGKRLYVHLYAYPFA--HLQLKGLAG-----RVEYAQFLHDGSE
Mfuc2    -----KGKRLYLHLFAWPFR--HVHLEGLAG-----RVEYAQLLSDGSE
Mfuc5    -----RGDRLYAHILDRGIG--PVNLRRLQD-----RLVYARLLADDSE
Mfuc6    -----RDDRIYLHLLMRPYD--TVSVRGLPIR-----RVRSVRALGADRE
Thma_opt -----KCNRI FVI FLGIPTGEKIVIEDLNLS-----AGTVRHFLTGER-
Mfuc3    LARPLFREYAI SAKRVHKQVIGNCLARLLPAPRVGANNLPSTAI VTVRQQGADLLVHLLH

```

: . : \*

```

          610      620      630      640      650      660
          |        |        |        |        |        |
Mfuc1    VQMDL----PEWEAGQLSVADDTLLLHLPIK-KPDAVVPVIELTLK-----
Mfuc4    IVLKP----TAWYSDHLTRGENTLVLELPVK-QPNTIVPVIELELKE-----
Mfuc7    VKLIEGA--VKHYGEGVPTSEDMLELEIPPV-KPASLLPVIELFLK-----
Mfuc2    IKRIELDPAVKASTIHMTGKPGTLTLELPVQ-RPDVLPVIELFLK-----
Mfuc5    IKLAR-----PWNSAEYP--DDAFITFPTAA-LPDDWDTVVELVLK-----
Mfuc6    LAFTTRAPIIESLFGADPVGEITITVPEDVV-DPYATVLAIIDVA-----
Thma_opt LSFKNVGKNLEITVP-----KKLLETDSIT-LVLEAVEE-----
Mfuc3    YVHQRRGQGLDVIEDALPLVDIELSVRAECPQTVQLVPELQPVEWSWQEGYVHLRIPRI
          :

          670
          |
Mfuc1    -----
Mfuc4    -----
Mfuc7    -----
Mfuc2    -----
Mfuc5    -----
Mfuc6    -----
Thma_opt -----
Mfuc3    NGYQIVQLQGAARE

```

**S4 Fig. Multiple sequence alignment of  $\alpha$ -L-fucosidases reported in this study.** The alignment was done using ClustalW. The catalytic nucleophile aspartate that is conserved in GH-29 family is shown with yellow background.
