# Supplementary material for: Novel α-L-Fucosidases from a Soil Metagenome for Production of Fucosylated Human Milk Oligosaccharides
Source: PubMed Central journal article supplement (PMC4723247; doi:10.1371/journal.pone.0147438), 2016-01-22
Supplement: pone.0147438.s007.pdf [file pone.0147438.s007.pdf]

**S1 File. Sequence of codon-optimised Thma-encoding gene. Gene sequence in FASTA format**

>Thma

```
ATGATTTCAATGAAACCGCGTTATAAACCGGATTGGGAATCACTGAGAGAACATACAGTTCCGAAATGGTTTG
ATAAAGCGAAATTTGGCATTTTTATCCATTGGGGCATCTATTCAGTTCGGGATGGGCAACACCGACAGGCGA
ACTGGGCAAAGTTCCGATGGATGCATGGTTTTTTCAAATCCGTATGCGGAATGGTATGAAAATAGCCTGCGC
ATTAAAGAATCACCGACATGGGAATATCATGTCAAAACATATGGCGAAAACTTTGAATATGAAAAATTTGCGG
ATCTTTTTTACAGCGGAAAAATGGGATCCGCAAGAATGGGCAGATTTGTTCAAAAAAGCAGGCGCAAAATATGT
CATCCCGACAACAAAACATCATGATGGCTTTTGCCGTGGGGCACGAAGTATACAGATTTTAAACAGCGTCAA
CGCGGACCGAAAAGAGATCTGGTTGGCGATCTGGCAAAAGCAGTTAGAGAAGCAGGCCTGAGATTTGGCGTCT
ATTATTCAGGCGGACTGGATTGGAGATTTACAACAGAACCGATTCGCTATCCGGAAGATCTGTCATATATTAG
ACCGAACACATATGAATATGCGGATTATGCGTATAAACAGGTTATGGAAGTGGTCGATCTGTATCTGCCGGAT
GTTCTGTGGAATGATATGGGCTGGCCTGAAAAAGGCAAAGAAGATCTGAAATATCTTTTTTGCGTATTACTATA
ACAAACATCCGGAAGGCAGCGTCAATGATAGATGGGGAGTTCCGCATTGGGATTTCAAACAGCAGAATATCA
TGTGAACTATCCTGGCGATCTTCCGGGATATAAATGGGAATTTACAAGAGGCATTGGCCTTAGCTTTGGCTAT
AATAGAAATGAAGGACCGGAACATATGCTGTCAGTTGAACAACCTGGTTTATACACTGGTTGATGTTGTTAGCA
AAGGCGGAAATCTGCTGCTGAATGTTGGACCGAAAGGCGATGGCACAATTCCGGATCTGCAAAAAGAAAGACT
GCTGGGCCTGGGCGAATGGCTGAGAAAAATATGGAGATGCAATTTATGGCACAAGCGTTTGGGAAAGATGCTGC
GCAAAAACAGAAGATGGCACAGAAATTCGCTTTACAAGAAAATGCAACCGCATTTTTTGTTCATCTTTCTGGGCA
TTCCTACAGGCGAAAAAATGTTATTGAAGATCTTAATCTGAGCGCAGGCACAGTTCGCCATTTTCTGACAGG
CGAAAGACTGAGCTTTAAAAACGTTGGCAAAAACCTGGAATCACGGTTCGAAAAAACTGCTGGAACGGAT
TCAATTACACTGGTTCTGGAAGCAGTCGAGGAA
```
