# Supplementary material for: Novel α-L-Fucosidases from a Soil Metagenome for Production of Fucosylated Human Milk Oligosaccharides
Source: PubMed Central journal article supplement (PMC4723247; doi:10.1371/journal.pone.0147438), 2016-01-22
Supplement: pone.0147438.s010.pdf [file pone.0147438.s010.pdf]

**S1 Table. List of primers used for amplification of  $\alpha$ -L-fucosidase-encoding genes.** Restriction sites are underlined, start and stop codons are indicated in bold.

| Name     | Sequence                                           | Restriction site |
|----------|----------------------------------------------------|------------------|
| mfuc1_fw | TAGCGGTCTC <b>ACAT</b> GTTGAAACCCAAACCGACCACC      | <i>BsaI</i>      |
| mfuc1_rv | TAGCGGATCCT <b>TTACTT</b> CAAAGTCAACTCAATCACC      | <i>BamHI</i>     |
| mfuc2_fw | TAGCGGTCTC <b>ACAT</b> GCAACACCAAGCGGCAG           | <i>BsaI</i>      |
| mfuc2_rv | TAGCGGATCCT <b>TTACTT</b> CAGGAACAGCTCGATCACTG     | <i>BamHI</i>     |
| mfuc3_fw | TAGCGGTCTC <b>ACAT</b> GGAAACACTTCCCTTTAGACAGGTC   | <i>BsaI</i>      |
| mfuc3_rv | TAGCGGATCCT <b>TTATT</b> TCTCTAGCGGCGCCCTG         | <i>BamHI</i>     |
| mfuc4_fw | TAGCGGTCTC <b>ACAT</b> GTACACACCCAAACCGACGC        | <i>BsaI</i>      |
| mfuc4_rv | TAGCGAATTC <b>CTACT</b> CTTTCAGCTCCAGCTCGATG       | <i>EcoRI</i>     |
| mfuc5_fw | TAGCGGTCTC <b>ACAT</b> GAATAACGATCGAATGCAGTGG      | <i>BsaI</i>      |
| mfuc5_rv | TAGCGAATTC <b>CTCATT</b> TCAACACCAGCTCCACG         | <i>EcoRI</i>     |
| mfuc6_fw | TAGCGGTCTC <b>ACAT</b> GAAAAAAACCAACACCTGGTTCG     | <i>BsaI</i>      |
| mfuc6_rv | TAGCGAATTC <b>CTCAAG</b> CCACGTCGATCGC             | <i>EcoRI</i>     |
| mfuc7_fw | TAGCGAAGAC <b>ACCAT</b> GACAAGCTATGTGACCCGCAAAAC   | <i>BbsI</i>      |
| mfuc7_rv | TAGCGAATTC <b>TTACTT</b> CAGAAAAAGCTCAATGACCG      | <i>EcoRI</i>     |
| Thma_fw  | ATCGGGTCTC <b>CCAT</b> GATTTCAATGAAACCGCGTTATAAACC | <i>BsaI</i>      |
| Thma_rv  | CGGGGTAC <b>CTTATT</b> CCTCGACTGCTTCCAGAACC        | <i>KpnI</i>      |
