# Supplementary material for: Novel α-L-Fucosidases from a Soil Metagenome for Production of Fucosylated Human Milk Oligosaccharides
Source: PubMed Central journal article supplement (PMC4723247; doi:10.1371/journal.pone.0147438), 2016-01-22
Supplement: pone.0147438.s011.pdf [file pone.0147438.s011.pdf]

**S2 Table. Substrate specificity of characterised GH29  $\alpha$ -L-fucosidases.** Abbreviations used as well as relevant references are listed below. The table is adapted from [http://www.cazy.org/GH29\\_characterized.html](http://www.cazy.org/GH29_characterized.html).

| Organism                                                        | Protein Name                                                              | EC#                   | GenBank                   | Uniprot          | Reported substrates hydrolyzed                                                                     | Reported substrates not hydrolyzed                                                                                                           |
|-----------------------------------------------------------------|---------------------------------------------------------------------------|-----------------------|---------------------------|------------------|----------------------------------------------------------------------------------------------------|----------------------------------------------------------------------------------------------------------------------------------------------|
| <i>Sulfolobus solfataricus</i> P2                               | $\alpha$ -L-fucosidase (FucA1;SSO11867 + SSO3060)                         | 3.2.1.51              | AAK43159.1<br>AAK43160.1  | Q97UG1<br>Q97UG2 | pNP-Fuc, $\alpha$ -L-Fuc-(1-3)- $\alpha$ -L-Fuc-O-4-NP [1]                                         | <i>NA</i>                                                                                                                                    |
| <i>Bacteroides thetaiotaomicron</i> VPI-5482                    | $\alpha$ -1,3/1,4-L-fucosidase / $\alpha$ -galactosidase (BT2192;BT_2192) | 3.2.1.111             | AAO77299.1                | Q8A5P6           | 3-FL, Le <sup>a</sup> , Le <sup>b</sup> , Le <sup>x</sup> , Le <sup>y</sup> , [2]                  | pNP-Fuc (very low), 2-FL (very low), Fuca1-3GlcNAc, Fuca1-4GlcNAc, Fuca1-6GlcNAc [2]                                                         |
| <i>Bacteroides thetaiotaomicron</i> VPI-5482                    | $\alpha$ -L-fucosidase (Fuc2970;BtFuc2970;BT2970;BT_2970)                 | 3.2.1.51              | AAO78076.1<br>NP_811882.1 | Q8A3I4           | pNP-Fuc, Fuca1-3GlcNAc, Fuca1-4GlcNAc (low) [2]                                                    | Fuca1-6GlcNAc, 2'FL, 3-FL, Le <sup>a</sup> , Le <sup>b</sup> , Le <sup>x</sup> , Le <sup>y</sup> [2]                                         |
| <i>Bifidobacterium bifidum</i> JCM 1254                         | $\alpha$ -1,3/4-L-fucosidase (AfcB;BbAfcB)                                | 3.2.1.111             | BAH80310.1                | C5NS94           | 3FL, Le <sup>a</sup> , Le <sup>b</sup> , Le <sup>x</sup> , Le <sup>y</sup> , LNFP II, LNFP III [3] | 2'-FL, Fuca1-6GlcNAc, Sle <sup>x</sup> (trace), pNP-Fuc [3]                                                                                  |
| <i>Bifidobacterium longum</i> subsp. <i>infantis</i> ATCC 15697 | $\alpha$ -1,3/1,4-L-fucosidase (Blon_2336)                                | 3.2.1.51<br>3.2.1.111 | ACJ53394.1                | B7GNN8           | CNP-fucose, 3'FL, LNFP III, Le <sup>a</sup> , Le <sup>x</sup> , partially LNFP I [4]               | 2'-FL, Fuca1-2Gal [4]                                                                                                                        |
| <i>Bifidobacterium longum</i> subsp. <i>infantis</i> ATCC 15697 | $\alpha$ -L-fucosidase (Blon_0248)                                        | 3.2.1.51              | ACJ51376.1                | B7GTT5           | CNP-fucose, LNFP III, partially LNFP I [4]                                                         | 2'-FL, 3-FL, Fuca1-2Gal [4]                                                                                                                  |
| <i>Bifidobacterium longum</i> subsp. <i>infantis</i> ATCC 15697 | $\alpha$ -L-fucosidase (Blon_0426)                                        | 3.2.1.51              | ACJ51546.1                | B7GN40           | CNP-fucose, LNFP III, partially LNFP I [4]                                                         | 2'-FL, 3-FL, Fuca1-2Gal [4]                                                                                                                  |
| <i>Lactobacillus casei</i> BL23                                 | $\alpha$ -L-fucosidase A (AlfA;LCABL_20390) (probable fragment)           | 3.2.1.51              | CAQ67115.1                | B3W8U6           | pNP-Fuc, Fuca1-6GlcNAc (low) [5]                                                                   | Fuca1-2Gal, Fuca1-2Gal $\beta$ 1-4GlcNAc, Fuca1-2Glc, Le <sup>x</sup> , Le <sup>a</sup> , Le <sup>b</sup> , Fuca1-3GlcNAc, Fuca1-4GlcNAc [5] |
| <i>Lactobacillus casei</i> BL23                                 | $\alpha$ -L-fucosidase B (AlfB;LCABL_28270)                               | 3.2.1.51              | CAQ67877.1                | B3WB08           | pNP-Fuc, Fuca1-3GlcNAc (high), Fuca1-2Gal, Fuca1-2Gal $\beta$ 1-4GlcNAc, 2'-FL, Fuca1-4GlcNAc [5]  | 3-FL, Le <sup>x</sup> , Le <sup>a</sup> , Le <sup>b</sup> , Fuca1-6GlcNAc [5]                                                                |
| <i>Lactobacillus casei</i> BL23                                 | $\alpha$ -L-fucosidase C (AlfC;LCABL_29340) (possible fragment)           | 3.2.1.51              | CAQ67984.1                | B3WB55           | pNP-Fuc, Fuca1-6GlcNAc (high), Fuca1-2Gal (low), Fuca1-3GlcNAc (low), Fuca1-4GlcNAc (low) [5]      | Fuca1-2Gal $\beta$ 1-4GlcNAc, 2'FL, 3-FL, Le <sup>x</sup> , Le <sup>a</sup> , Le <sup>b</sup> [5]                                            |

|                                                                |                                                            |           |             |                  |                                                                                                                                                      |                                                                                                                             |
|----------------------------------------------------------------|------------------------------------------------------------|-----------|-------------|------------------|------------------------------------------------------------------------------------------------------------------------------------------------------|-----------------------------------------------------------------------------------------------------------------------------|
| <i>Paenibacillus thiaminolyticus</i>                           | $\alpha$ -L-fucosidase (aLfk1)                             | 3.2.1.51  | CBM40947.1  | E3PQQ9           | pNP-fuc [6]                                                                                                                                          | <b>NA</b>                                                                                                                   |
| <i>Streptomyces</i> sp. 142                                    | $\alpha$ -1,3/1,4-L-fucosidase (N/A)                       | 3.2.1.111 | AAD10477.1  | Q9Z4I9           | <u>Oligosaccharides labeled with 2-amionpyridine:</u><br>LNFPII-PA, LNFPIII-PA, Fuca $\alpha$ 1-2LNFPII-PA                                           | <u>Oligosaccharides labeled with 2-amionpyridine</u><br>sialylated-LNFPII-PA (very low), 2'-FL-PA (very low), LNFPI-PA, ... |
| <i>Tannerella forsythia</i> ATCC 43037                         | $\alpha$ -1,2-L-fucosidase (Fuc1;TfFuc1;BFO_2737)          | 3.2.1.63  | AEW21393.1  | G8UMQ6           | pNP-fuc, 2'FL H-trisaccharide, Fuca $\alpha$ 1-6GlcNAc [7]                                                                                           | 3-FL, Le <sup>a</sup> , A antigen tetraose, Fuc( $\alpha$ 1-4)Gal [7]                                                       |
| <i>Thermotoga maritima</i> MSB8                                | $\alpha$ -L-fucosidase (TM0306)                            | 3.2.1.51  | AAD35394.1  | Q9WYE2           | pNP-fuc [8]                                                                                                                                          | <b>NA</b>                                                                                                                   |
| <i>Xanthomonas campestris</i> pv. <i>campestris</i> ATCC 33913 | [N-glycan] $\alpha$ -1,3-L-fucosidase (NixE;FucA1;XCC2888) | 3.2.1.51  | AAM42160.1  | Q8P6S7           | AMC (7-amino-4-methylcoumarin) substrates:<br>LNFPII-AMC, LNFPIII-AMC [9]                                                                            | AMC (7-amino-4-methylcoumarin) substrates:<br>2'-FL-AMC [9]                                                                 |
| <i>Arabidopsis thaliana</i>                                    | $\alpha$ -1,3/4-L-fucosidase 1 (AtFUC1;At2g28100)          | 3.2.1.111 | NP_180377.2 | Q8GW72<br>Q9ZUV2 | 2-aminobenzamide labeled LNFP II, 3FL, fucose linked $\alpha$ 1-4 to non-reducing end in higher DP oligoes [10]                                      | 2-aminobenzamide labeled 2'-FL, pNP-Fuc, fucose linked $\alpha$ 1-3 to reducing end [10]                                    |
| <i>Canis lupus familiaris</i>                                  | $\alpha$ -L-fucosidase (FUCA1)                             | 3.2.1.51  | CAA63362.1  | P48300           | 4-methylumbelliferyl- $\alpha$ -L-fucopyranoside [11]                                                                                                | <b>NA</b>                                                                                                                   |
| <i>Dictyostelium discoideum</i>                                | $\alpha$ -L-fucosidase (AlfA)                              | 3.2.1.51  | AAO51149.1  | P10901           | 6-O-alpha-L-fucopyranosyl-N-acetylglucosaminitol, low activity on 2'-fucosyllactitol, very low on 3-fucosyllactitol and Lacto-N-fucopentaitol I [12] | Lacto-N-fucopentaitol II, Lacto-N-fucopentaitol III [12]                                                                    |
| <i>Drosophila melanogaster</i>                                 | $\alpha$ -L-fucosidase (Fuca;DmFuca;CG6128)                | 3.2.1.51  | AAM50292.1  | Q9VTJ4           | <b>NA</b>                                                                                                                                            | <b>NA</b>                                                                                                                   |
| <i>Fusarium graminearum</i> PH-1                               | $\alpha$ -L-fucosidase (Fco1;FgFCO1;fg11254)               | 3.2.1.51  | AFR68935.1  | J9UN47           | pea XG oligosaccharides (Fuca $\alpha$ 1-2Gal $\beta$ 1-2Xyl in XXFG) [13], 2'-FL, Fuca $\alpha$ 1-2Gal (low) [14]                                   | pNP-Fuc (very weak), 3-FL, Le <sup>a</sup> , Le <sup>x</sup> (very weak) [14]                                               |

|                                |                                                 |          |            |                  |                                                                                                                                                                                                                                                           |                                                                                                                        |
|--------------------------------|-------------------------------------------------|----------|------------|------------------|-----------------------------------------------------------------------------------------------------------------------------------------------------------------------------------------------------------------------------------------------------------|------------------------------------------------------------------------------------------------------------------------|
| <i>Fusarium oxysporum</i> 0685 | $\alpha$ -L-fucosidase (Fco1;FoFCO1)            | 3.2.1.51 | AFR68934.1 | J9TMS7           | pNP-Fuc [13], fucoidan, porcine gastrin mucin [15]                                                                                                                                                                                                        | <b>NA</b>                                                                                                              |
| <i>Homo sapiens</i>            | $\alpha$ -L-fucosidase (FucA1)                  | 3.2.1.51 | AAA52481.1 | P04066<br>Q8NAC2 | 4-methylumbelliferyl $\alpha$ -L-fucopyranoside, pNP-Fuc, 2'-FL, LNFPII, LNFPIII, $\alpha$ 1-2Fuc-decasaccharide, Fuca1-6GlcNAc, $\alpha$ -L-fucose residues linked to the 2 position of galactose or the 3, 4, or 6 position of N-acetylglucosamine [16] | 4-methylumbelliferyl $\beta$ -fucopyranoside, 4-methylumbelliferyl $\alpha$ -galactopyranoside, pNP- $\beta$ -Fuc [16] |
| <i>Homo sapiens</i>            | $\alpha$ -L-fucosidase (FucA2;Mgc1314;dJ20N2.5) | 3.2.1.51 | CAB53746.1 | Q7Z6V2<br>Q9BTY2 | Hydrolyzes pNP-Fuc, prefers $\alpha$ 1-2 but capable of cleaving some $\alpha$ 1-3, and $\alpha$ 1-4 linkages [17]                                                                                                                                        | <b>NA</b>                                                                                                              |
| <i>Rattus norvegicus</i>       | $\alpha$ -L-fucosidase (FucA1;FucA)             | 3.2.1.51 | CAA34268.1 | P17164           | Hydrolyzes pNP-Fuc, $\alpha$ 1-2, $\alpha$ 1-3, and $\alpha$ 1-4 fucosyl linkages, and glycopeptides derived from $\beta$ -glucuronidase but not native glycopeptides, lower activity on $\alpha$ 1-6 linkages [18]                                       | Fuca1-2GlcNAc $\beta$ -pNP                                                                                             |

### Abbreviations used:

|                                 |                                                              |
|---------------------------------|--------------------------------------------------------------|
| 2'FL                            | Fuca1-2Gal $\beta$ 1-4Glc                                    |
| 3-FL                            | Gal $\beta$ 1-4(Fuca1-3)Glc                                  |
| A antigen tetraose              | GalNAc $\beta$ 1-3( $\alpha$ Fuc1-2)Gal $\beta$ 1-4Glc       |
| Antigen H disaccharide          | Fuca1-2Gal $\beta$                                           |
| Antigen H type II trisaccharide | Fuca1-2Gal $\beta$ 1-4GlcNAc                                 |
| CNP-Fucose                      | 2-chloro-4-nitrophenyl- $\alpha$ -L-fucopyranoside           |
| Le <sup>a</sup> trisaccharide   | Gal $\beta$ 1-3(Fuca1-4)GlcNAc                               |
| Le <sup>b</sup> trisaccharide   | Fuca1-2Gal $\beta$ 1-3(Fuca1-4)GlcNAc                        |
| Le <sup>x</sup> trisaccharide   | Gal $\beta$ 1-3(Fuca1-3)GlcNAc                               |
| Le <sup>y</sup> trisaccharide   | Fuca1-2Gal $\beta$ 1-3(Fuca1-3)GlcNAc                        |
| LNFP I                          | Fuca1-2Gal $\beta$ 1-3GlcNAc $\beta$ 1-3Gal $\beta$ 1-4Glc   |
| LNFP II                         | Gal $\beta$ 1-3(Fuca1-4)GlcNAc $\beta$ 1-3Gal $\beta$ 1-4Glc |
| LNFP III                        | Gal $\beta$ 1-3(Fuca1-3)GlcNAc $\beta$ 1-3Gal $\beta$ 1-4Glc |
| LNFP V                          | Gal $\beta$ 1-3GlcNAc $\beta$ 1-3Gal $\beta$ 1-4(Fuca1-3)Glc |
| pNP-Fuc                         | 4-Nitrophenyl $\alpha$ -L-fucopyranoside                     |

## References

1. Cobucci-Ponzano B, Trincone A, Giordano A, Rossi M, Moracci M. Identification of an Archaeal  $\alpha$ -L-Fucosidase Encoded by an Interrupted Gene. *J Biol Chem*. 2003;278: 14622–14631.
2. Sakurama H, Tsutsumi E, Ashida H, Katayama T, Yamamoto K, Kumagai H. Differences in the Substrate Specificities and Active-Site Structures of Two - L -Fucosidases ( Glycoside Hydrolase Family 29 ) from *Bacteroides thetaiotaomicron*. *Biosc Biotech Biochem*. 2012;76: 1022–1024.
3. Ashida H, Miyake A, Kiyohara M, Wada J, Yoshida E, Kumagai H, et al. Two distinct ??-L-fucosidases from *Bifidobacterium bifidum* are essential for the utilization of fucosylated milk oligosaccharides and glycoconjugates. *Glycobiology*. 2009;19: 1010–1017.
4. Sela D a., Garrido D, Lerno L, Wu S, Tan K, Eom HJ, et al. *Bifidobacterium longum* subsp. *infantis* ATCC 15697  $\alpha$ -fucosidases are active on fucosylated human milk oligosaccharides. *Appl Environ Microbiol*. 2012;78: 795–803.
5. Rodríguez-Díaz J, Monedero V, Yebra MJ. Utilization of natural fucosylated oligosaccharides by three novel  $\alpha$ -L-fucosidases from a probiotic *Lactobacillus casei* strain. *Appl Environ Microbiol*. 2011;77: 703–705.
6. Benesová E, Lipovová P, Dvoráková H, Králová B.  $\alpha$ -L-fucosidase from *Paenibacillus thiaminolyticus*: its hydrolytic and transglycosylation abilities. *Glycobiology*. 2013;23: 1052–65.
7. Megson ZA, Koerdts A, Schuster H, Ludwig R, Janesch B, Frey A, et al. Characterization of an  $\alpha$ -L-fucosidase from the periodontal pathogen *Tannerella forsythia*. *Virulence*. 2015;6: 282–92.
8. Osanjo G, Dion M, Drone J, Solleux C, Tran V, Rabiller C, et al. Directed Evolution of the R- L -Fucosidase from *Thermotoga maritima* into an. *Biochemistry*. 2007;46: 1022–1033.
9. Wong-Madden ST, Landry D. Purification and characterization of novel glycosidases from the bacterial genus *Xanthomonas*. *Glycobiology*. 1995;5: 19–28.
10. Zeleny R, Leonard R, Dorfner G, Dalik T, Kolarich D, Altmann F. Molecular cloning and characterization of a plant  $\alpha$ 1,3/4-fucosidase based on sequence tags from almond fucosidase I. *Phytochemistry*. 2006;67: 641–648.
11. Bielicki J, Muller V, Fuller M, Hopwood JJ, Anson DS. Recombinant canine alpha-L-fucosidase: expression, purification, and characterization. *Mol*

Genet Metab. 2000;69: 24–32.

12. Schopohl D, Müller-Taubenberger A, Orthen B, Hess H, Reutter W. Purification and properties of a secreted and developmentally regulated alpha-L-fucosidase from *Dictyostelium discoideum*. *J Biol Chem* . 1992;267 : 2400–2405.
13. Paper JM, Scott-Craig JS, Cavalier D, Faik A, Wiemels RE, Borrusch MS, et al.  $\alpha$ -Fucosidases with different substrate specificities from two species of *Fusarium*. *Appl Microbiol Biotechnol*. 2012;97: 5371–80.
14. Cao H, Walton JD, Brumm P, Phillips GN. Structure and substrate specificity of a eukaryotic fucosidase from *Fusarium graminearum*. *J Biol Chem*. 2014; 0–31.
15. Yamamoto K, Tsuji Y, Kumagai H, Tochikura T. Induction and Purification of  $\alpha$ -L-Fucosidase from *Fusarium oxysporum*. *Agric Biol Chem*. Taylor & Francis; 1986;50: 1689–1695.
16. Dawson G, Tsay G. Substrate specificity of human alpha-L-fucosidase. *Arch Biochem Biophys*. UNITED STATES; 1977;184: 12–23.
17. Dicioccio RA, Barlow JJ, Khushi L. Substrate Specificity and Other Properties of a-L-Fucosidase from Human Serum \*. *J Biol Chem*. 1982;257: 714–718.
18. Opheim DJ, Touster O. Complex Carbohydrates Part C [Internet]. *Methods in Enzymology*. Elsevier; 1978.
